# Supplementary material for: Novel C3-symmetric n-type tris(aroyleneimidazole) and its analogs: synthesis, physical properties and self-assembly
Source: Royal Society of Chemistry journal article supplement (doi:10.1039/c0cc04753h), 2011-01-01
Supplement: c0cc04753h.pdf [file c0cc04753h.pdf]

# Novel $C_3$ -Symmetric *n*-Type Tris(aryleneimidazole) and Its Analogs: Synthesis, Physical Properties and Self-Assembly

David Hanifi, Dennis Cao, Liana M. Klivansky, Yi Liu\*

The Molecular Foundry, Lawrence Berkeley National Laboratory, One  
Cyclotron Road, Berkeley, California, USA 94720.

Email: [yliu@lbl.gov](mailto:yliu@lbl.gov)

## Electronic Supplementary Information

## Table of Contents

|                                                                |     |
|----------------------------------------------------------------|-----|
| <b><i>General Methods</i></b>                                  | S3  |
| <b><i>Computation Methodology</i></b>                          | S4  |
| <b><i>Materials Synthesis</i></b>                              | S4  |
| <b><i>Thermogravitic Analysis</i></b>                          | S8  |
| Figure S1-S2                                                   | S8  |
| Figure S3-S4                                                   | S9  |
| <b><i>DSC of TAI-b</i></b>                                     | S10 |
| Figure S5                                                      | S10 |
| <b><i>Polarized Optical Images</i></b>                         | S10 |
| Figure S6                                                      | S10 |
| <b><i>Electrochemical Measurements</i></b>                     | S11 |
| Figure S7                                                      | S11 |
| <b><i>Powder XRD Measurement</i></b>                           | S11 |
| Figure S8                                                      | S11 |
| <b><i>Thin-film UV-vis Spectra</i></b>                         | S12 |
| Figure S9                                                      | S12 |
| <b><i>UV-vis Titration Spectra of TAI-b</i></b>                | S12 |
| Figure S10                                                     | S12 |
| <b><i>Fluorescence Spectra</i></b>                             | S13 |
| Figure S11                                                     | S13 |
| <b><i>MALDI-TOF Spectra</i></b>                                | S13 |
| Figure S12                                                     | S13 |
| Figure S13                                                     | S14 |
| Figure S14                                                     | S15 |
| Figure S15                                                     | S16 |
| Figure S16                                                     | S17 |
| <b><i><sup>1</sup>H NMR and <sup>13</sup>C NMR Spectra</i></b> | S18 |
| Figure S17                                                     | S18 |
| Figure S18                                                     | S19 |
| Figure S19                                                     | S20 |
| Figure S20                                                     | S21 |
| Figure S21                                                     | S22 |
| Figure S22                                                     | S23 |
| Figure S23                                                     | S24 |
| Figure S24                                                     | S25 |
| Figure S25                                                     | S26 |
| <b><i>References</i></b>                                       | S26 |

## Experimental Section

**General Methods:** Reagents were purchased from Aldrich or synthesized as described. Thin-layer chromatography (TLC) was carried out using aluminum sheets, precoated with silica gel 60F (Merck 5554). The plates were inspected by UV-light. Proton and carbon nuclear magnetic resonance spectra ( $^1\text{H-NMR}$  and  $^{13}\text{C-NMR}$ ) spectra were recorded on a Bruker Avance500 II, using the deuterated solvent as lock and tetramethylsilane as internal standard. All chemical shifts are quoted using the  $\delta$  scale, and all coupling constants ( $J$ ) are expressed in Hertz (Hz). Matrix-assisted laser desorption ionization (MALDI) mass spectra were measured on 4800 MALDI TOF/TOF analyzer from Applied Biosystems. SEM images were recorded on a Zeiss Gemini Ultra-55 Analytic Scanning Electron Microscope. UV-vis absorption and fluorescence spectra were recorded on Cary 500 UV-vis-NIR spectrophotometer and Nanolog spectrofluorometer, respectively. All the thin-film samples were prepared by spincoating the corresponding  $\text{CH}_2\text{Cl}_2$  solution ( $\sim 5 \text{ mg / mL}$ ) onto a quartz substrate. The electrochemical experiments were carried out in  $\text{N}_2$ -purged  $\text{CH}_2\text{Cl}_2$  solutions at concentrations ranging from  $1.0 \times 10^{-4}$  to  $1.0 \times 10^{-3}$  M and with 0.1 M tetrabutylammonium hexafluorophosphate ( $\text{TBAPF}_6$ ) as supporting electrolyte. Cyclic voltammetric (CV) experiments were performed with a Princeton 265A instrument interfaced to a PC using a glassy carbon working electrode, a Pt electrode as the counter electrode, and a silver wire as a pseudo-reference electrode. The surface of the working electrode was polished routinely with a  $0.05 \mu\text{m}$  alumina-water slurry on a felt surface immediately before use. In all cases ferrocene ( $E_{1/2} = +0.395 \text{ V vs SCE}$ ) was present as internal standard for the potential values. TGA and DSC curves were obtained using QA5000IR and Q200 from

TA Instruments, respectively. Compound **1**<sup>s1</sup> and **2a-b**<sup>s2</sup> were synthesized according to literature procedures. Optical and polarized optical images were taken using a Leica DM4500P microscope. Powder XRD data was collected on a Bruker-AXS D8 Discover with GADDS powder X-ray diffractometer with Cu K<sub>α</sub> radiation.

### Computational Methodology

All calculations were performed using Q-Chem 3.2.<sup>s3</sup> The free softwares Avogadro and Q-Chem User Interface (QUI) were used as the molecular builder and the script editor, respectively. To simplify the calculation, methyl was used as the side chains that attached to the **TAI** core, which should have a minimal effect on the optimized molecular structure and the frontier orbitals. The energy level of the HOMO and the LUMO of the **TAI** molecule was carried out at the DFT level<sup>s4,s5</sup> using B3LYP/6-311G\* basis set. DFT/B3LYP/6-311G\* has been found to be an accurate formalism for calculating the structural and electronic properties of many molecular systems.<sup>s6</sup> No symmetry constraints were imposed during the optimization process. The electrostatic potential was plotted with an ISO value of 0.01.

### Materials Synthesis

**Method A – Condensation Reaction in DMF.** A mixture of **1** (102 mg, 0.607 mmol), **2a** (0.690 g, 1.82 mmol) and Zn(OAc)<sub>2</sub> (180 mg, 0.981 mmol) was dissolved in degassed DMF (30 mL) under N<sub>2</sub> and stirred at 170 °C for 18 hs. The reaction mixture was concentrated under reduced pressure and subsequently partitioned between CH<sub>2</sub>Cl<sub>2</sub> and water (50 mL each). After extracting the aqueous layer twice with CH<sub>2</sub>Cl<sub>2</sub> (2 × 30 mL), the organic layers were combined, dried over MgSO<sub>4</sub>, filtered and evaporated to dryness. The residue was subjected to column chromatography (Silica, CH<sub>2</sub>Cl<sub>2</sub> 100% to 3%

MeOH in CH<sub>2</sub>Cl<sub>2</sub>) to get a mixture (450 mg) of the tetramer **5a**, the acyclic trimer **4a**, and the asymmetric cyclic trimer **3a**. A portion of the mixture (60 mg) was subjected to preparative TLC (1.5% (v/v) MeOH in CH<sub>2</sub>Cl<sub>2</sub>) to get **5a**, **4a** and **3a** as an orange-red, green and red solid in a yield of 24%, 22% and 16%, respectively.

**Scheme S1.** Condensation reaction using DMF as the solvent

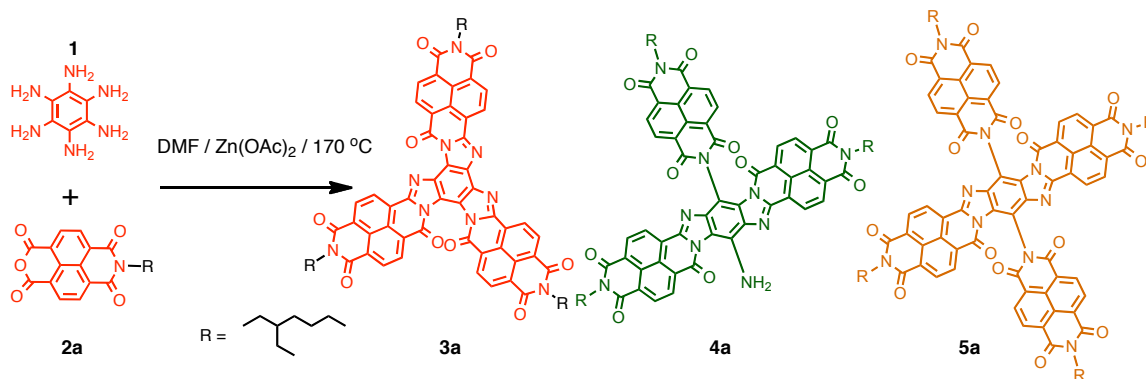

**3a:** <sup>1</sup>H NMR (C<sub>6</sub>D<sub>5</sub>Cl, 500 MHz, 373 K): δ = 8.60 (d, *J* = 8.0 Hz, 2 H), 8.55 (d, *J* = 8.0 Hz, 2 H), 8.52 (d, *J* = 8.0 Hz, 2 H), 8.45 (d, *J* = 8.0 Hz, 2 H), 8.42 (d, *J* = 8.0 Hz, 4 H), 8.37 (m, 6 H), 8.33 (d, *J* = 8.0 Hz, 2 H), 8.31 (m, 4 H), 4.05 (m, 6 H), 1.95 (m, 3 H), 1.32–1.11 (m, 33 H), 0.85 (m, 9 H). MS (MALDI-TOF): [M + H]<sup>+</sup> calcd. 1198.4827, found 1198.6910 (100%).

**4a:** <sup>1</sup>H NMR (CDCl<sub>3</sub>, 500 MHz, 298 K): δ = 8.95 (d, *J* = 8.0 Hz, 4 H), 8.81 (d, *J* = 6.0 Hz, 1 H), 8.66 (d, *J* = 6.0 Hz, 1 H), 8.51 (d, *J* = 6.0 Hz, 1 H), 8.48 (d, *J* = 6.0 Hz, 1 H), 8.31 (d, *J* = 6.0 Hz, 1 H), 8.26 (d, *J* = 6.0 Hz, 1 H), 8.10 (d, *J* = 6.0 Hz, 1 H), 7.94 (d, *J* = 6.0 Hz, 1 H), 6.39 (br s, 2 H), 4.35 (br s, 2 H), 4.08 (br s, 2 H), 3.65 (br s, 2 H), 1.89 (br s, 2 H), 1.70–1.23 (m, 34 H), 0.96 (br s, 3 H), 0.87 (t, *J* = 7.0 Hz, 6 H). <sup>13</sup>C NMR (CDCl<sub>3</sub>, 125 MHz, 298 K): δ = 163.9, 163.1, 162.5, 162.2, 162.1, 161.7, 158.7, 158.2, 149.2, 145.7, 143.9, 132.6, 131.7, 131.4, 131.1, 131.0, 130.8, 130.6, 130.1, 129.9, 127.9, 127.6, 127.3, 127.1, 126.9, 126.8, 126.6, 125.9, 125.3, 125.2, 125.0, 124.8, 124.8, 122.7, 121.5,

117.7, 102.1, 41.1, 40.9, 40.4, 31.9, 31.8, 31.8, 29.7, 29.4, 29.3, 29.3, 29.2, 29.2, 28.3, 28.1, 27.9, 27.2, 27.1, 27.0, 22.7, 22.6, 22.6, 14.2, 14.1, 14.1; MS (MALDI-TOF):  $[M]^+$  calcd. 1215.4854, found 1215.6841 (100%).

**5a:**  $^1\text{H}$  NMR ( $\text{CDCl}_3$ , 500 MHz, 298 K):  $\delta$  = 8.92 (m, 8 H), 8.63 (d,  $J$  = 8.0 Hz, 2 H), 8.61 (d,  $J$  = 8.0 Hz, 2 H), 8.60 (d,  $J$  = 8.0 Hz, 2 H), 8.51 (d,  $J$  = 8.0 Hz, 2 H), 4.26 (m, 4 H), 4.12 (m, 4 H), 2.03 (m, 2 H), 1.90 (m, 2 H), 1.47 (m, 8 H), 1.37 (m, 16 H), 1.30 (m, 8 H), 1.02 (t,  $J$  = 7.5 Hz, 6 H), 0.96 (t,  $J$  = 7.5 Hz, 6 H), 0.91 (t,  $J$  = 7.5 Hz, 6 H), 0.86 (t,  $J$  = 7.5 Hz, 6 H).  $^{13}\text{C}$  NMR ( $\text{CDCl}_3$ , 125 MHz, 298 K):  $\delta$  = 163.4, 163.1, 163.1, 162.9, 158.6, 150.7, 143.4, 132.1, 131.6, 131.4, 131.2, 130.8, 130.2, 127.9, 127.8, 127.3, 127.2, 127.1, 127.0, 126.8, 125.7, 125.1, 124.9, 115.0, 44.7, 44.6, 38.1, 38.0, 30.8, 30.7, 28.7, 28.6, 24.1, 24.0, 23.1, 23.0, 14.2, 14.1, 10.7, 10.5; MS (MALDI-TOF):  $[M + H]^+$  calcd. 1577.6176, found 1578.1060 (25%).

**Method B – Condensation Reaction in Quinoline.** A mixture of **1** (0.100 g, 0.590 mmol) and  $\text{Zn}(\text{OAc})_2$  (0.163 mg, 0.888 mmol) was dissolved in degassed quinoline (20 mL). A solution of **2b** (0.632 g, 1.67 mmol) in quinoline (10 mL) was added slowly into the above mixture over 30 min under  $\text{N}_2$  and stirred at 170 °C for 18 hs. The reaction mixture was concentrated under reduced pressure and subsequently partitioned between  $\text{CH}_2\text{Cl}_2$  and water (50 mL each). After extracting the aqueous layer twice with  $\text{CH}_2\text{Cl}_2$  (2  $\times$  30 mL), the organic layers were combined, dried over  $\text{MgSO}_4$ , filtered and evaporated to dryness. The residue was subjected to column chromatography (Silica,  $\text{CH}_2\text{Cl}_2$  100% to 3% MeOH in  $\text{CH}_2\text{Cl}_2$ ) to get a mixture (520 mg) of **4b** and **TAI-b**. A portion of the mixture (60 mg) was subjected to recycling GPC ( $\text{CHCl}_3$ ) to give **4b** and **TAI-b** as a green and red solid in a yield of 35% and 25%, respectively.

**Scheme S2.** Condensation reaction using quinoline as the solvent

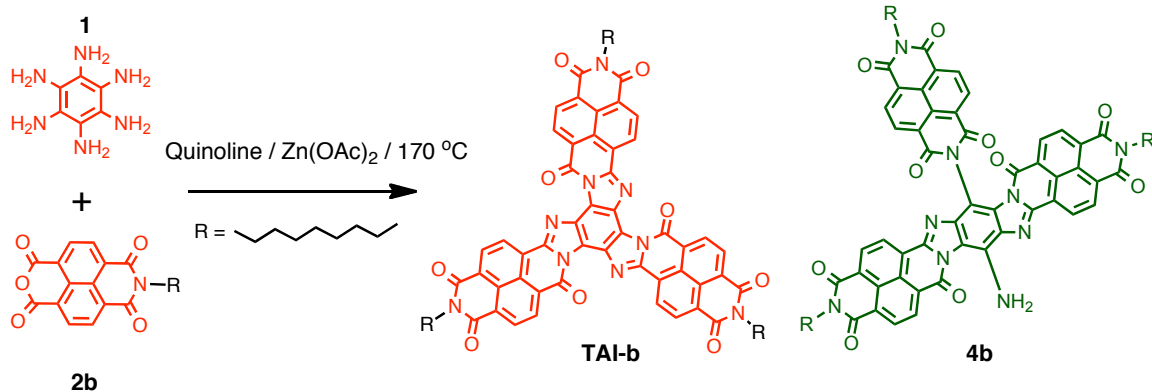

**4b**: <sup>1</sup>H NMR (CDCl<sub>3</sub>, 500 MHz, 298 K):  $\delta$  = 8.95 (m, 4 H), 8.83 (d,  $J$  = 8.0 Hz, 1 H), 8.66 (d,  $J$  = 8.0 Hz, 1 H), 8.61 (m, 2 H), 8.55 (d,  $J$  = 8.0 Hz, 1 H), 8.52 (d,  $J$  = 8.0 Hz, 1 H), 8.48 (d,  $J$  = 8.0 Hz, 1 H), 8.36 (d,  $J$  = 8.0 Hz, 1 H), 6.71 (br s, 2 H), 4.34 (t,  $J$  = 8.0 Hz, 2 H), 4.17 (t,  $J$  = 8.0 Hz, 2 H), 3.99 (t,  $J$  = 8.0 Hz, 2 H), 1.87 (m, 2 H), 1.74 (m, 2 H), 1.38–1.30 (m, 32 H), 0.98 (t,  $J$  = 7.5 Hz, 3 H), 0.85 (m, 6 H). <sup>13</sup>C NMR (CDCl<sub>3</sub>, 125 MHz, 298 K):  $\delta$  = 163.8, 163.1, 162.5, 162.1, 162.0, 161.7, 158.6, 158.2, 149.2, 145.7, 143.9, 132.5, 131.6, 131.1, 130.9, 130.8, 130.6, 130.1, 129.9, 127.9, 127.5, 127.3, 127.1, 126.8, 126.7, 126.5, 125.8, 125.1, 125.0, 124.8, 124.7, 122.7, 121.1, 116.0, 108.6, 102.2, 41.1, 40.9, 40.4, 31.9, 31.8, 31.8, 29.7, 29.4, 29.3, 29.3, 29.2, 29.2, 28.3, 28.1, 27.9, 27.2, 27.1, 27.0, 22.7, 22.6, 22.6, 14.2, 14.1, 14.1; MS (MALDI-TOF): [M]<sup>+</sup> calcd. 1215.4854, found 1215.6721 (100%).

**TAI-b**: <sup>1</sup>H NMR (C<sub>2</sub>D<sub>2</sub>Cl<sub>4</sub>, 500 MHz, 413 K):  $\delta$  = 7.92 (br s, 6 H), 7.67 (br s, 3 H), 7.64 (br s, 3 H), 3.78 (br s, 6 H), 1.62 (br s, 6 H), 1.34–1.21 (m, 30 H), 0.86 (br s, 9 H). <sup>13</sup>C NMR (C<sub>2</sub>D<sub>2</sub>Cl<sub>4</sub>, 125 MHz, 413 K):  $\delta$  = 162.9, 162.8, 156.4, 147.0, 139.9, 132.1, 131.6, 131.1, 128.1, 127.7, 127.4, 127.0, 125.5, 124.9, 123.5, 121.8, 33.1, 31.1, 30.6, 30.5, 29.4,

28.6, 23.9, 15.3. MS (MALDI-TOF):  $[M + H]^+$  calcd. 1198.4827, found 1198.7484  
(100%).

### Thermogravitic Analysis

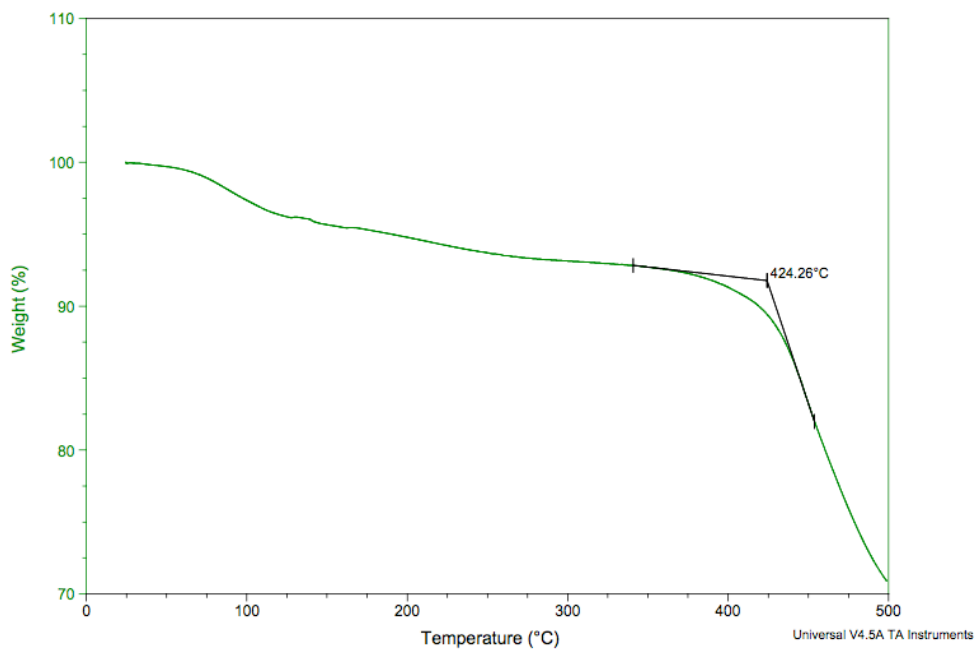

Figure S1. TGA of **3a**.

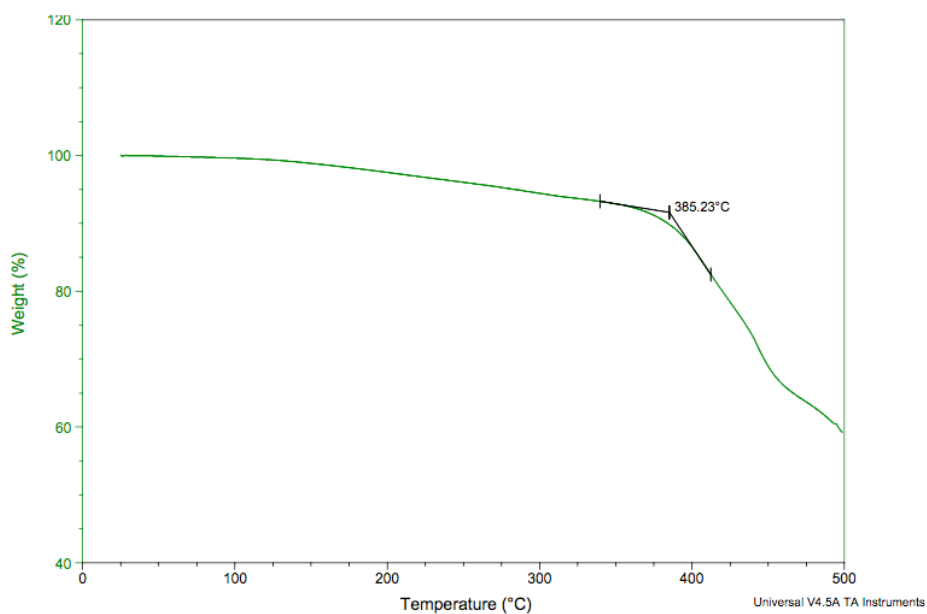

Figure S2. TGA of **4a**.



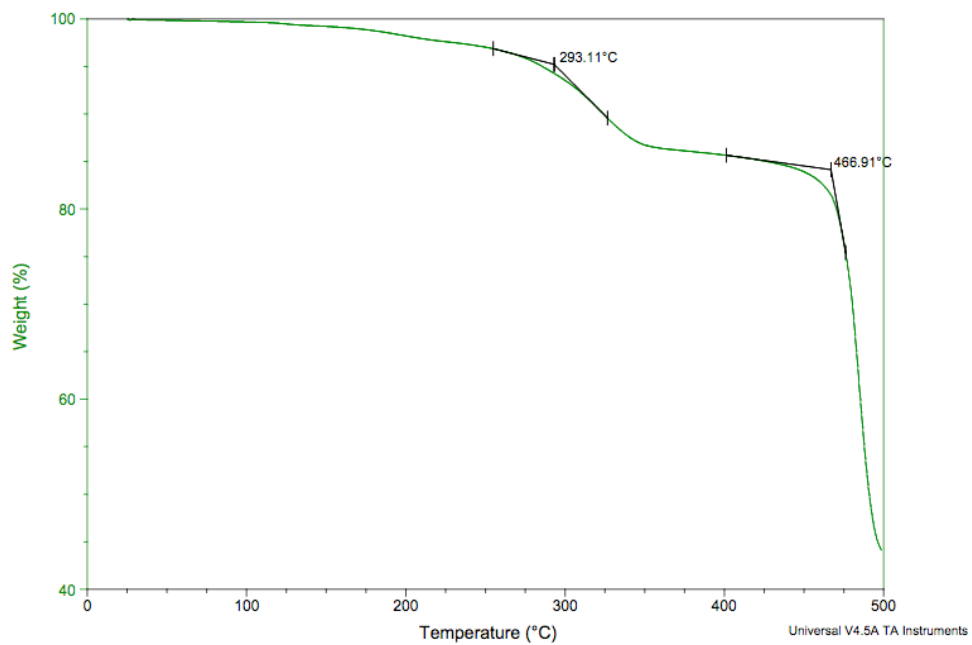

Figure S3. TGA of **5a**.

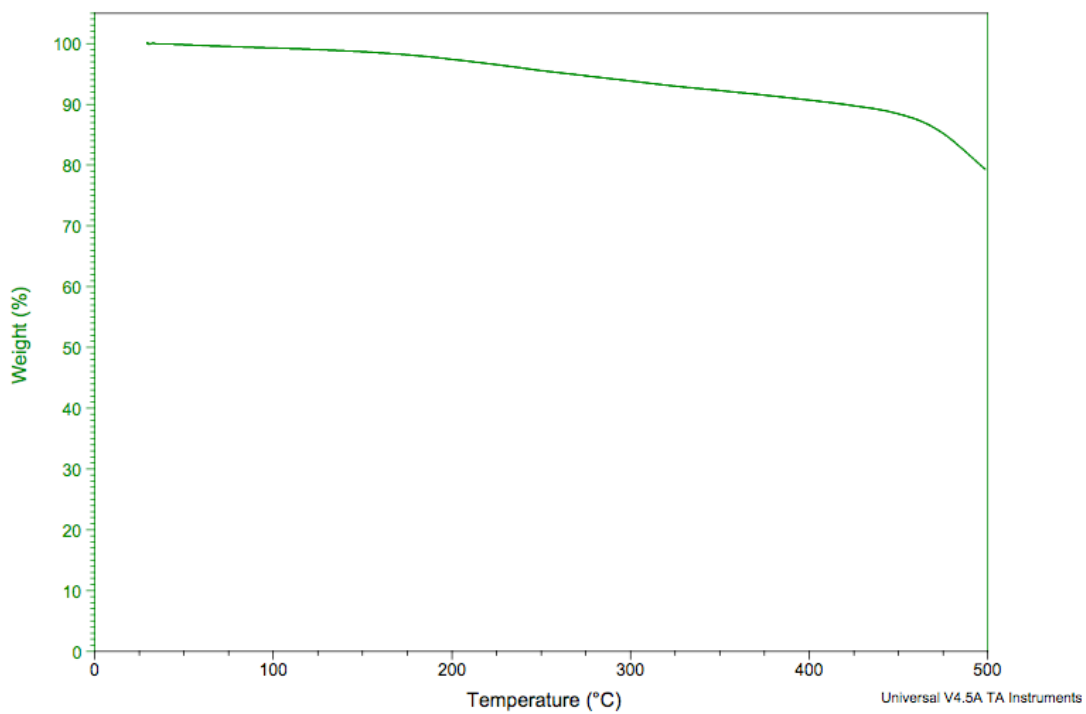

Figure S4. TGA of **TAI-b**.

### DSC trace of TAI-b

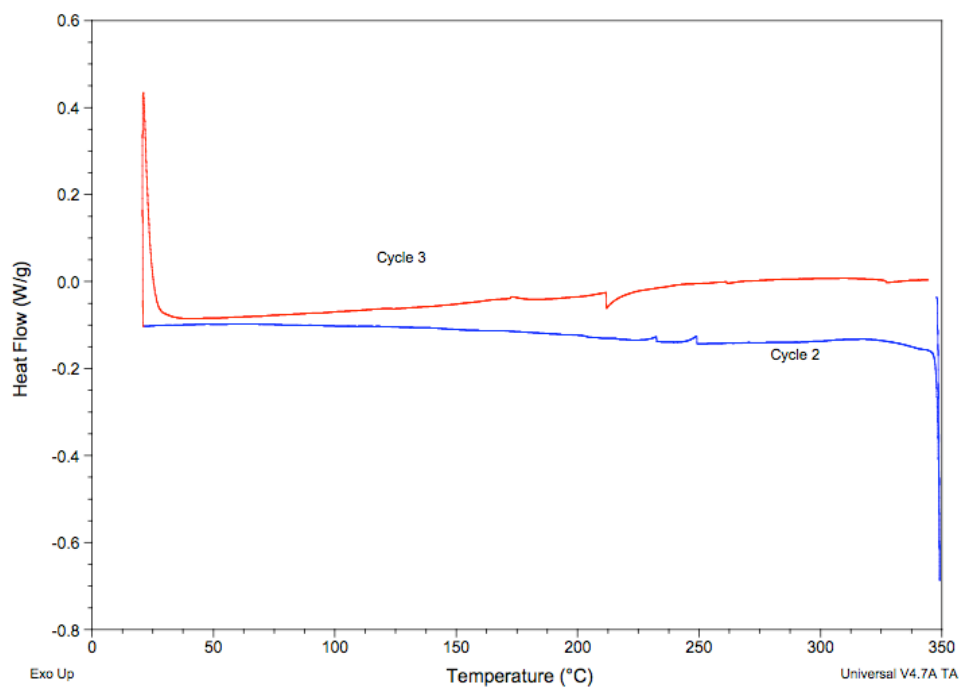

Figure S5. DSC of **TAI-b**. Note that the bumps are system artifacts from the instrument rather than real phase transitions.

### Optical Images

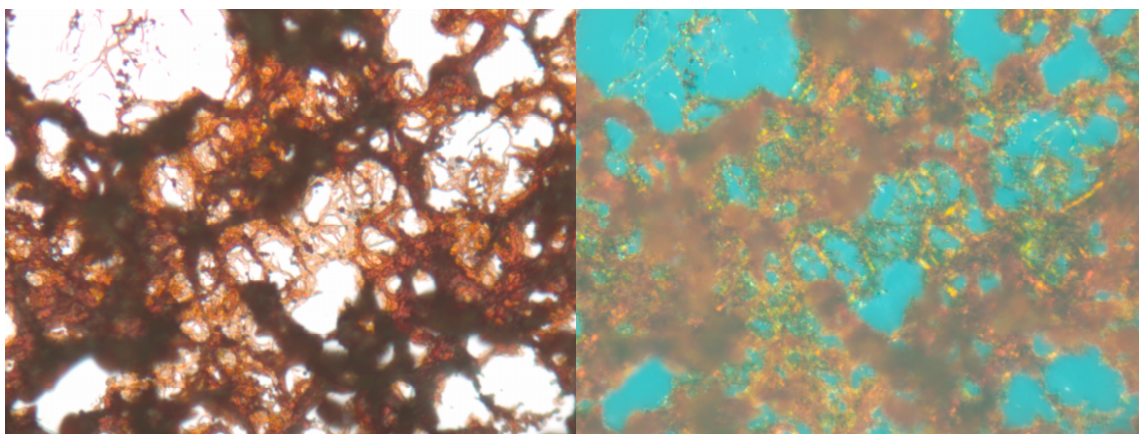

Figure S6. Normal optical image (left) and polarized optical image (right) of **TAI-b** nanofibers ( $\times 500$ ).

## Electrochemical Measurements

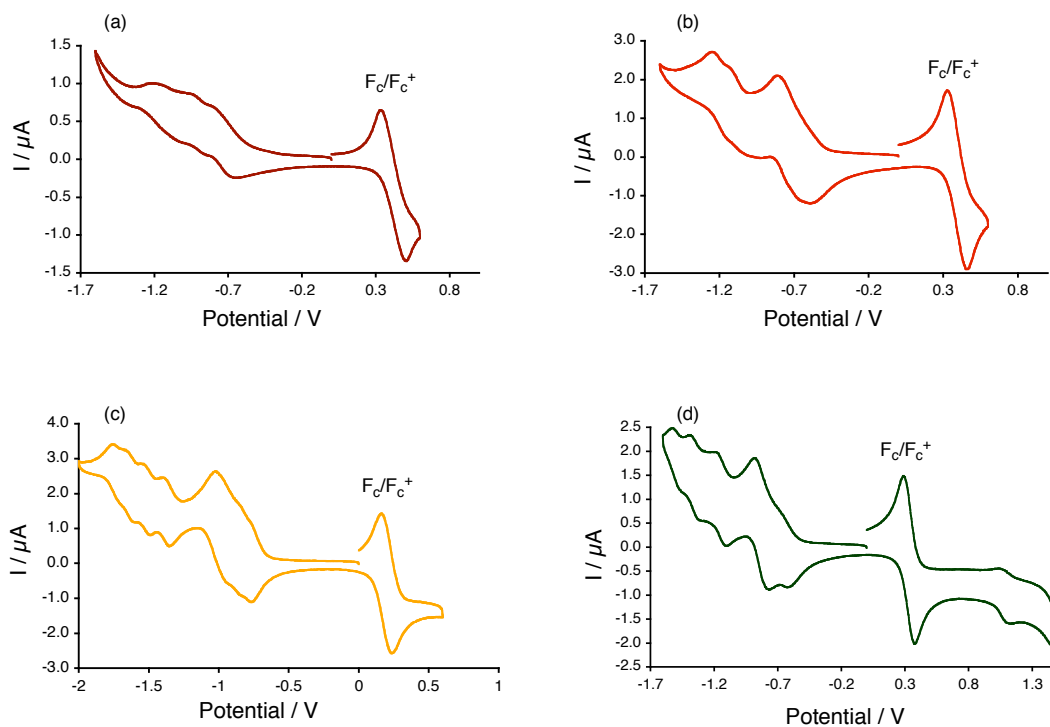

Figure S7. CV of (a) **TAI-b**, (b) **3a**, (c) **5a** and (d) **4b**. Ferrocene/ferrocenium redox couple was used as the internal standard in all cases.

## Powder XRD

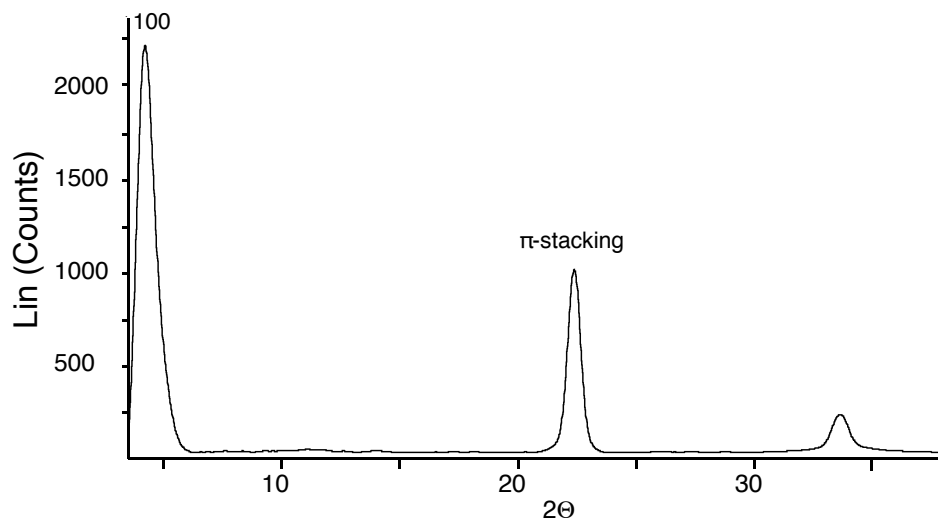

Figure S8. Powder XRD of the **TAI-b** nanofibers.

### Thin-Film UV-vis Spectra

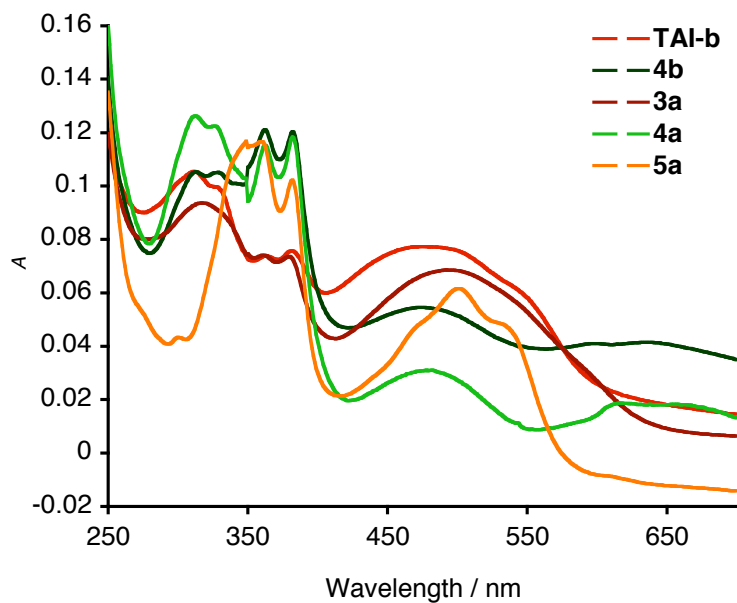

Figure S9. Thin film UV-vis spectra of **TAI-b** (red), **4b** (green), **3a** (deep red), **4a** (light green) and **5a** (orange).

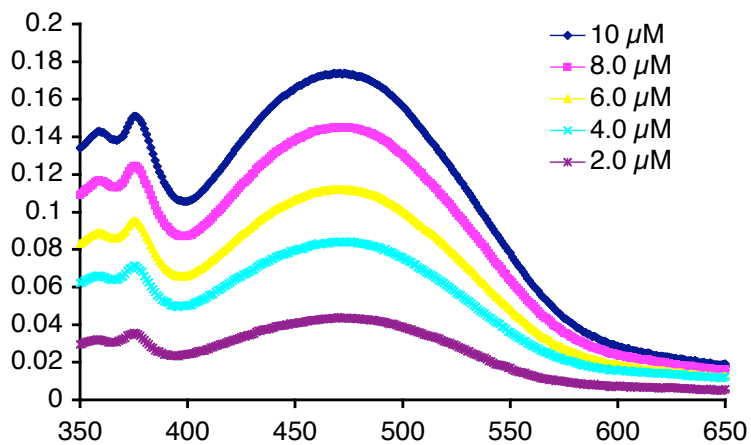

Figure S10. UV-vis spectra of **TAI-b** at 10  $\mu\text{M}$ , 8.0  $\mu\text{M}$ , 6.0  $\mu\text{M}$ , 4.0  $\mu\text{M}$  and 2.0  $\mu\text{M}$ .

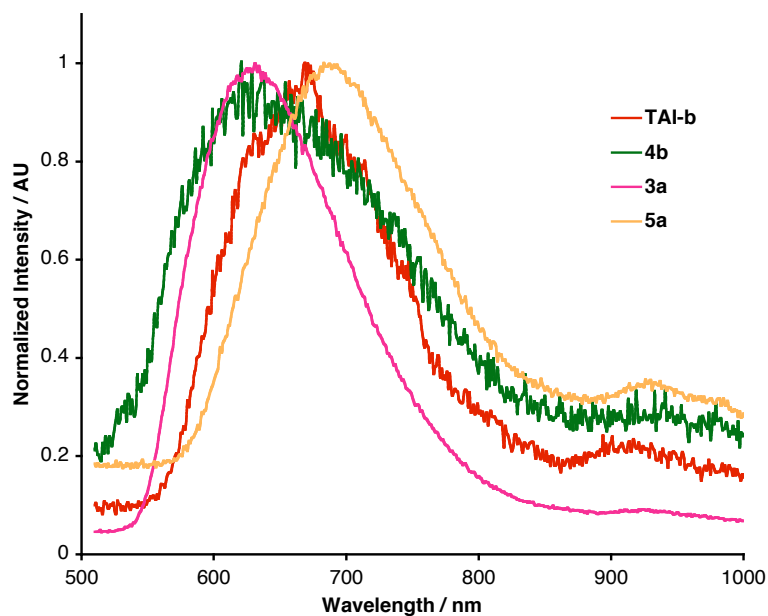

Figure S11. Fluorescence spectra of **TAI-b**, **4b**, **3a**, **4a** and **5a**.

### MALDI-TOF Spectra

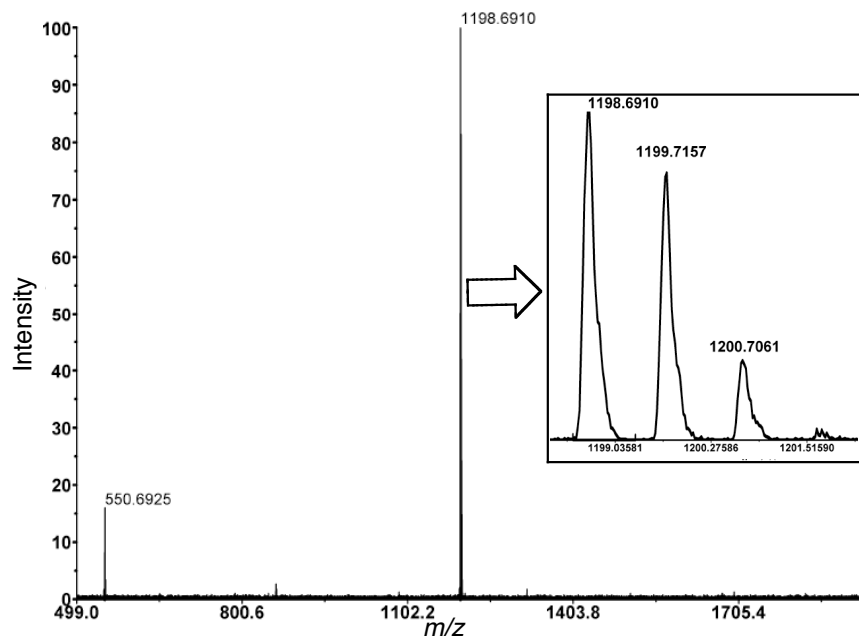

Figure S12. MALDI-TOF spectrum of asymmetric cyclic trimer **3a**. The insert indicates the isotopic distribution of the molecular ion peak.

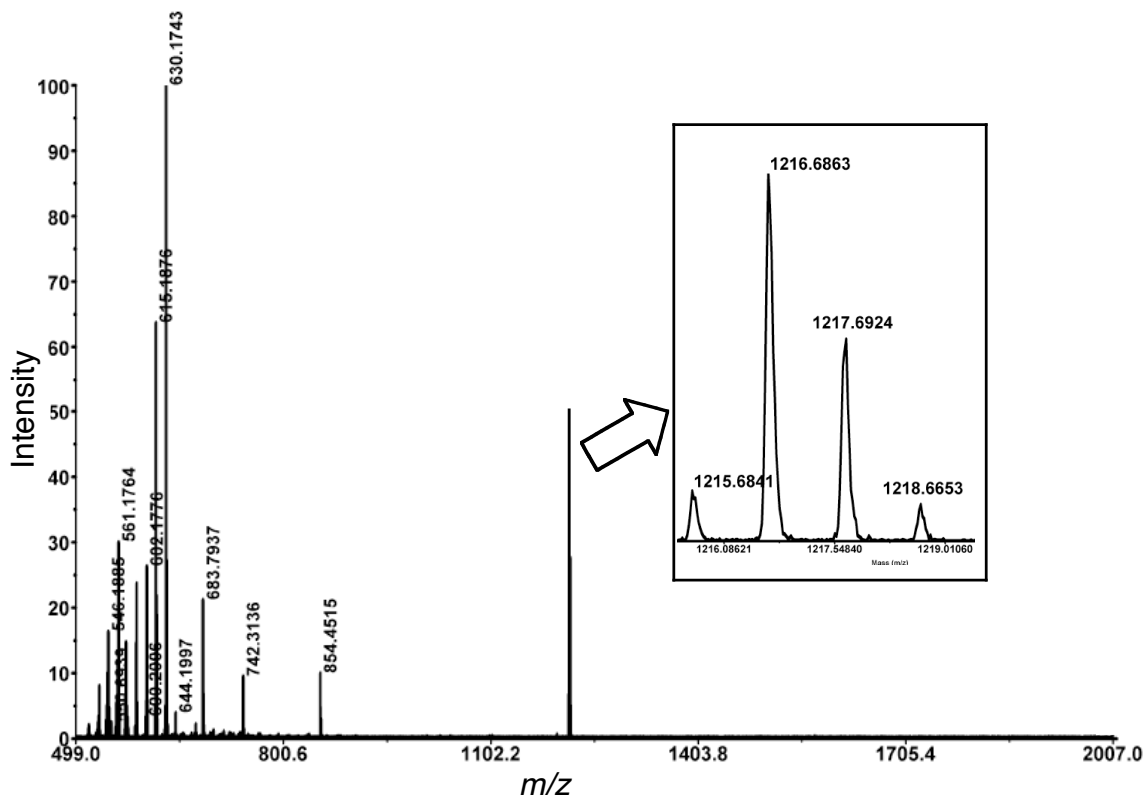

Figure S13. MALDI-TOF spectrum of acyclic trimer **4a**. The insert indicates the isotopic distribution of the molecular ion peak.

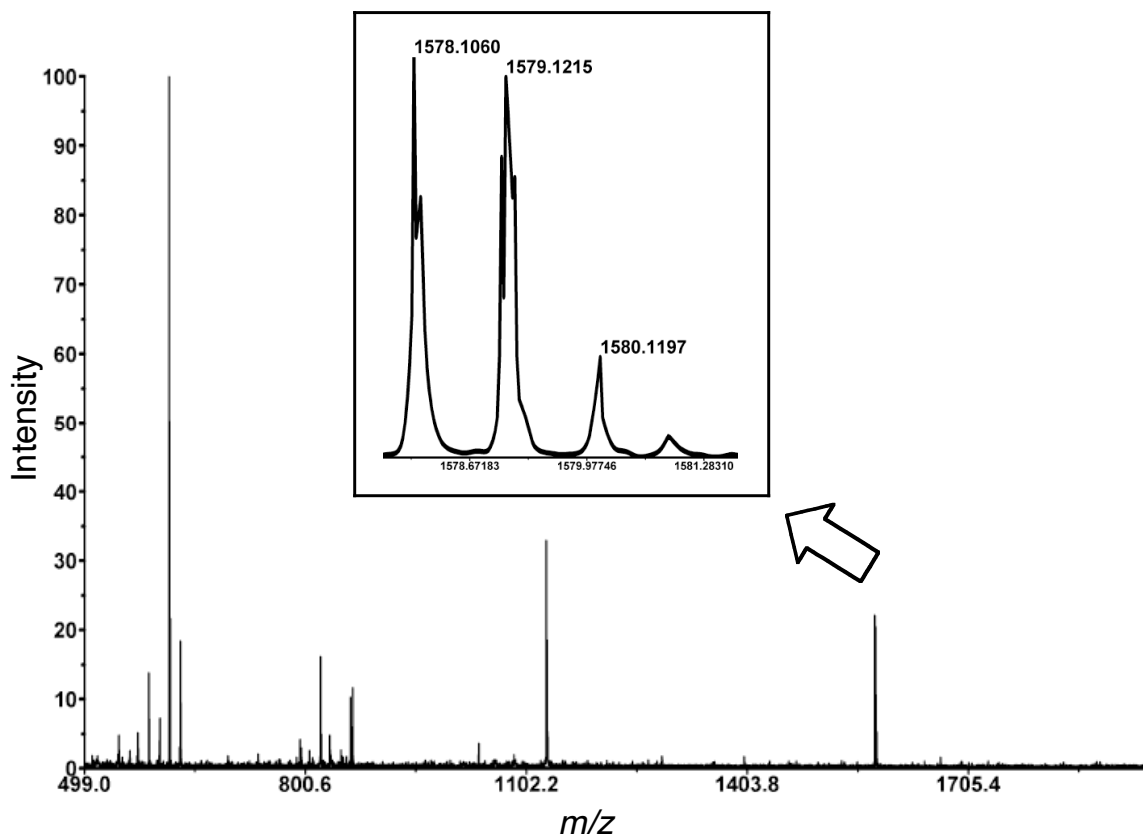

Figure S14. MALDI-TOF spectrum of tetramer **5a**. The insert indicates the isotopic distribution of the molecular ion peak.

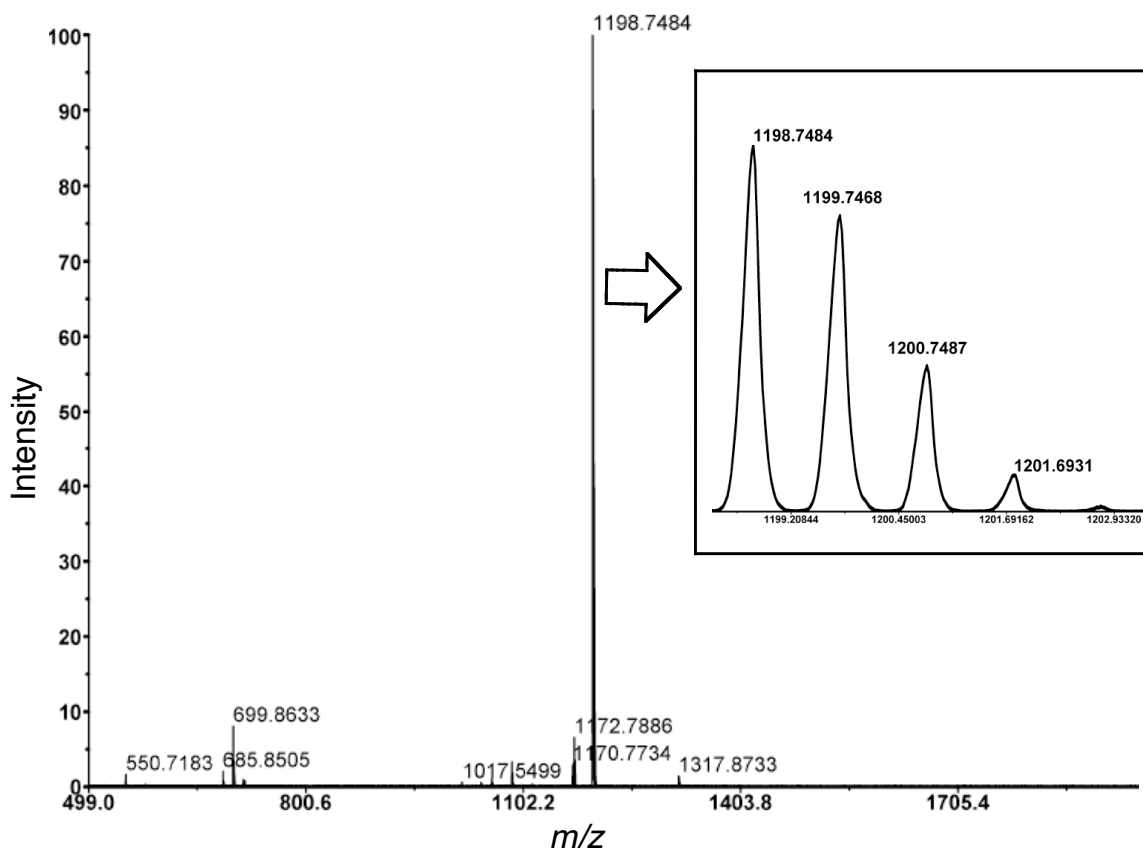

Figure S15. MALDI-TOF spectrum of **TAI-b**. The insert indicates the isotopic distribution of the molecular ion peak.



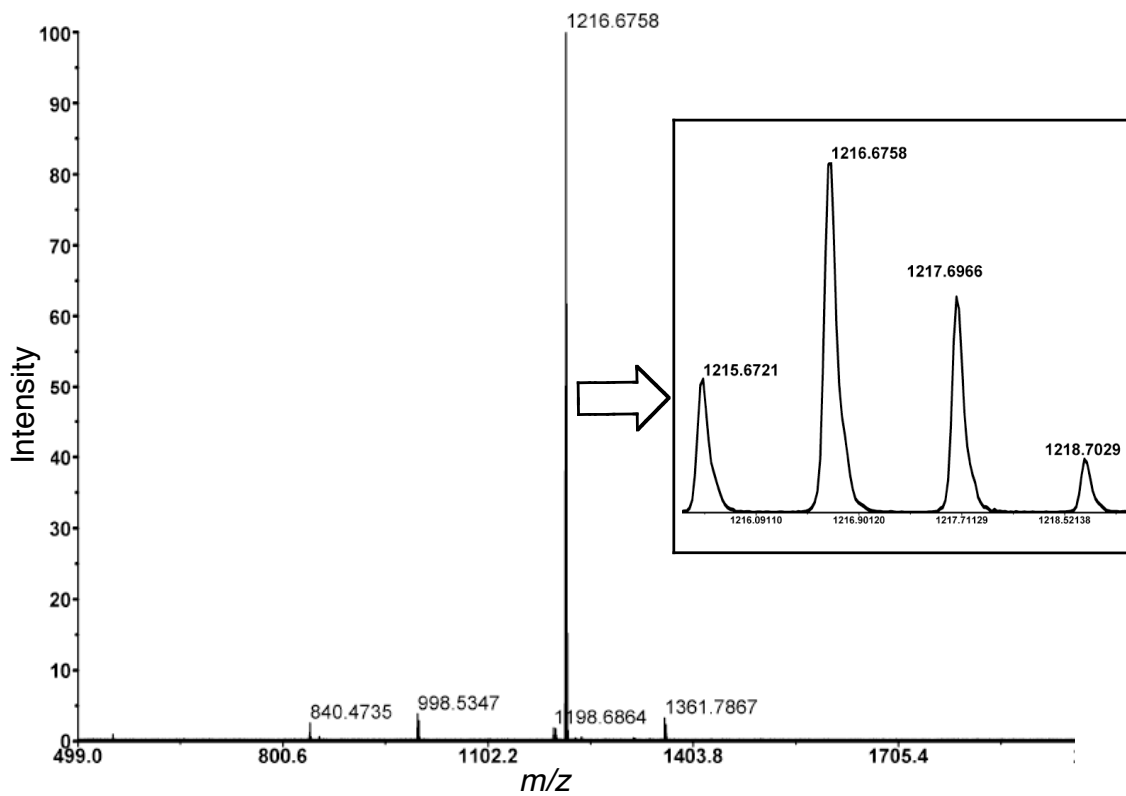

Figure S16. MALDI-TOF spectrum of acyclic trimer **4b**. The insert indicates the isotopic distribution of the molecular ion peak.

### $^1\text{H}$ NMR and $^{13}\text{C}$ NMR Spectra

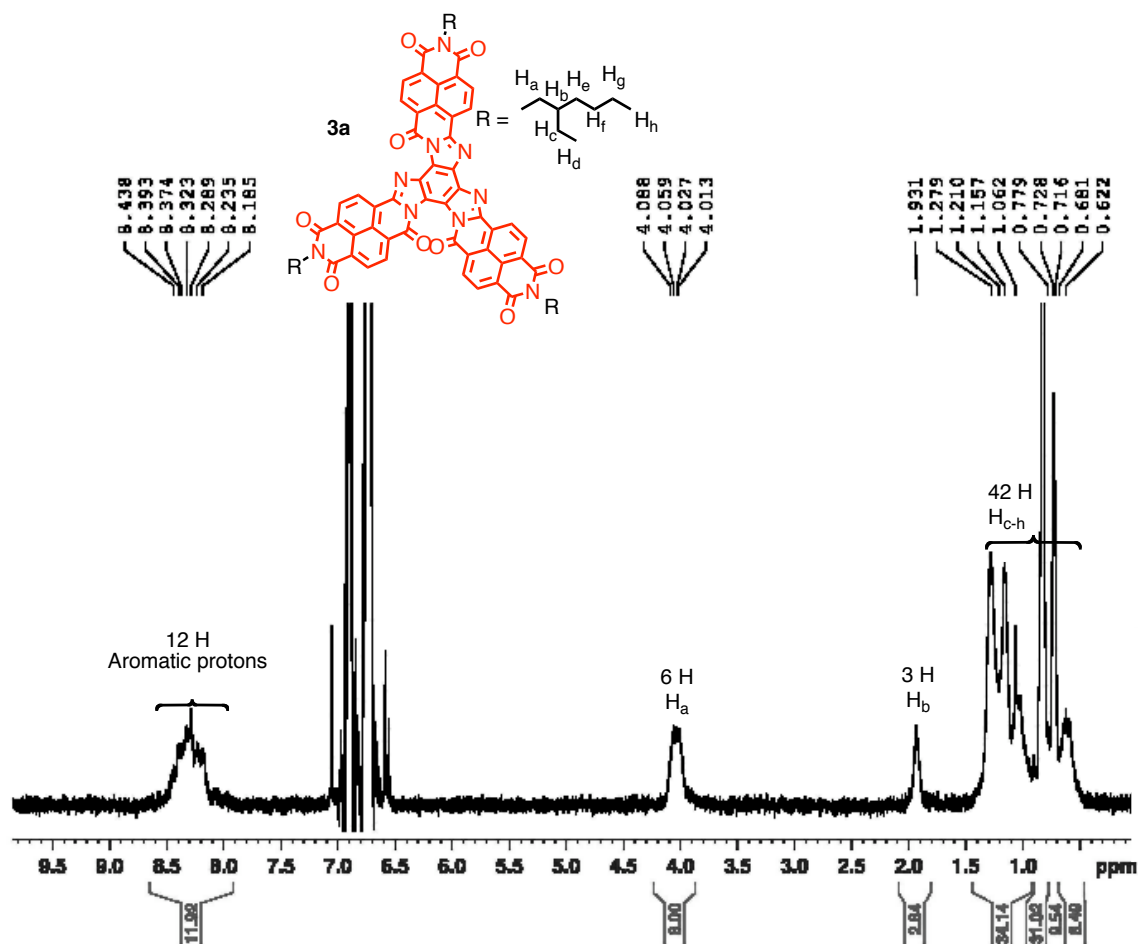

Figure S17.  $^1\text{H}$  NMR of **3a** (298 K,  $\text{C}_6\text{D}_5\text{Cl}$ ).

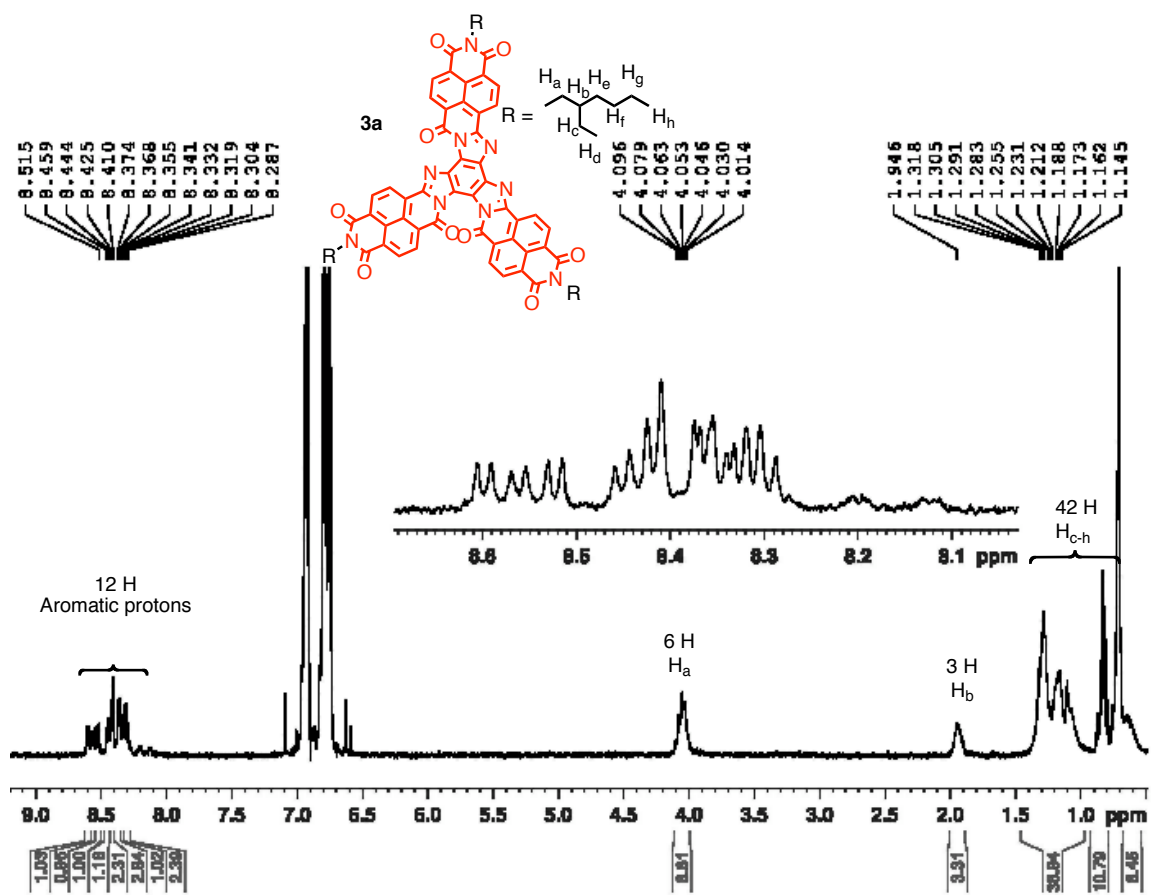

Figure S18.  $^1\text{H}$  NMR of **3a** (373 K,  $\text{C}_6\text{D}_5\text{Cl}$ ), The insert is a blow-up of the aromatic region.

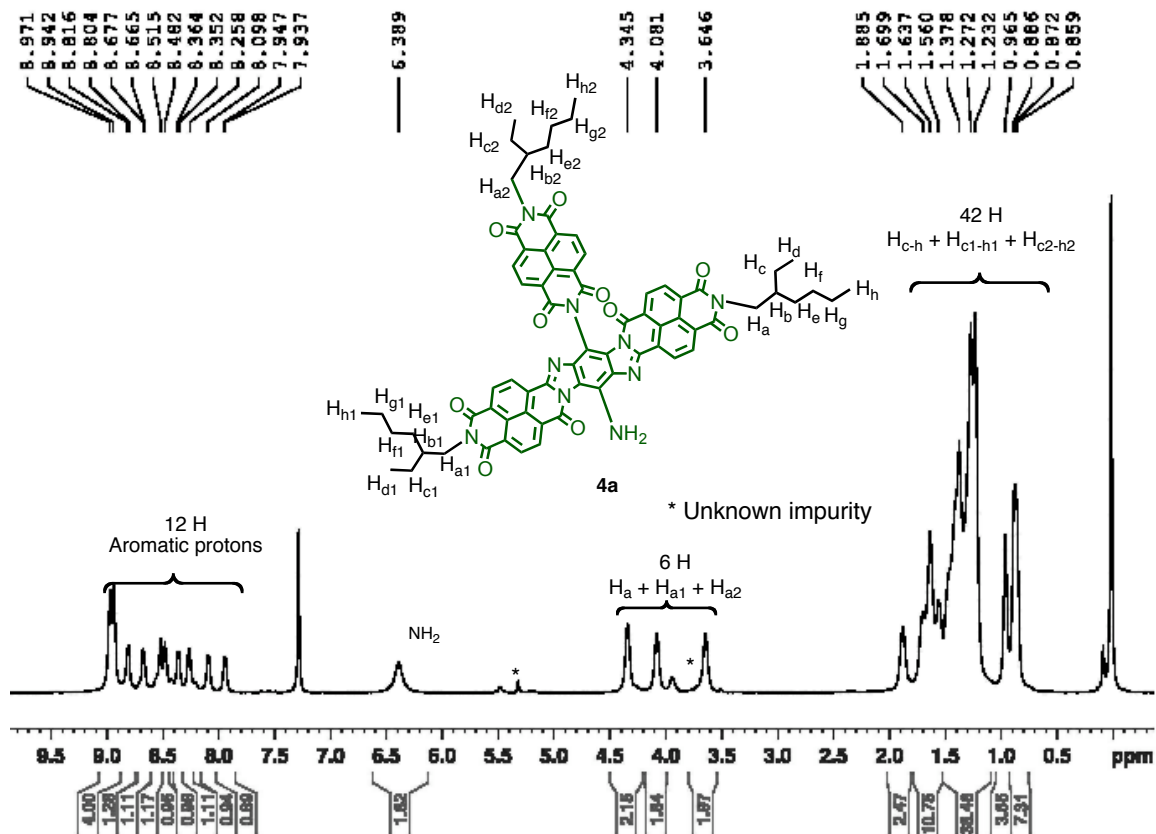

Figure S19. <sup>1</sup>H NMR of **4a** (298 K,  $CDCl_3$ ).

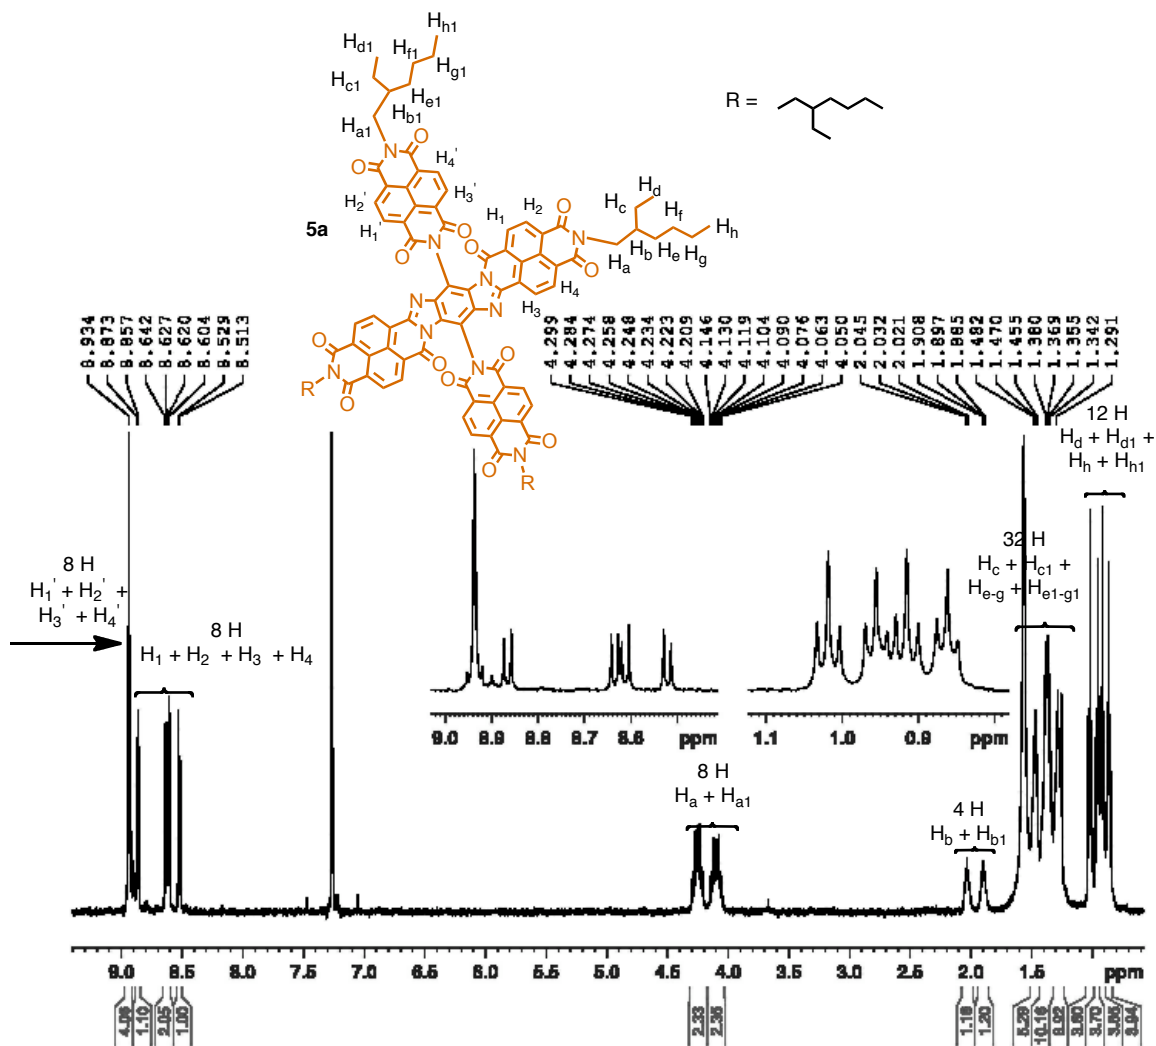

Figure S20. <sup>1</sup>H NMR of **5a** (298 K, CDCl<sub>3</sub>). The insert is a blow-up of the aromatic region and the methyl protons.

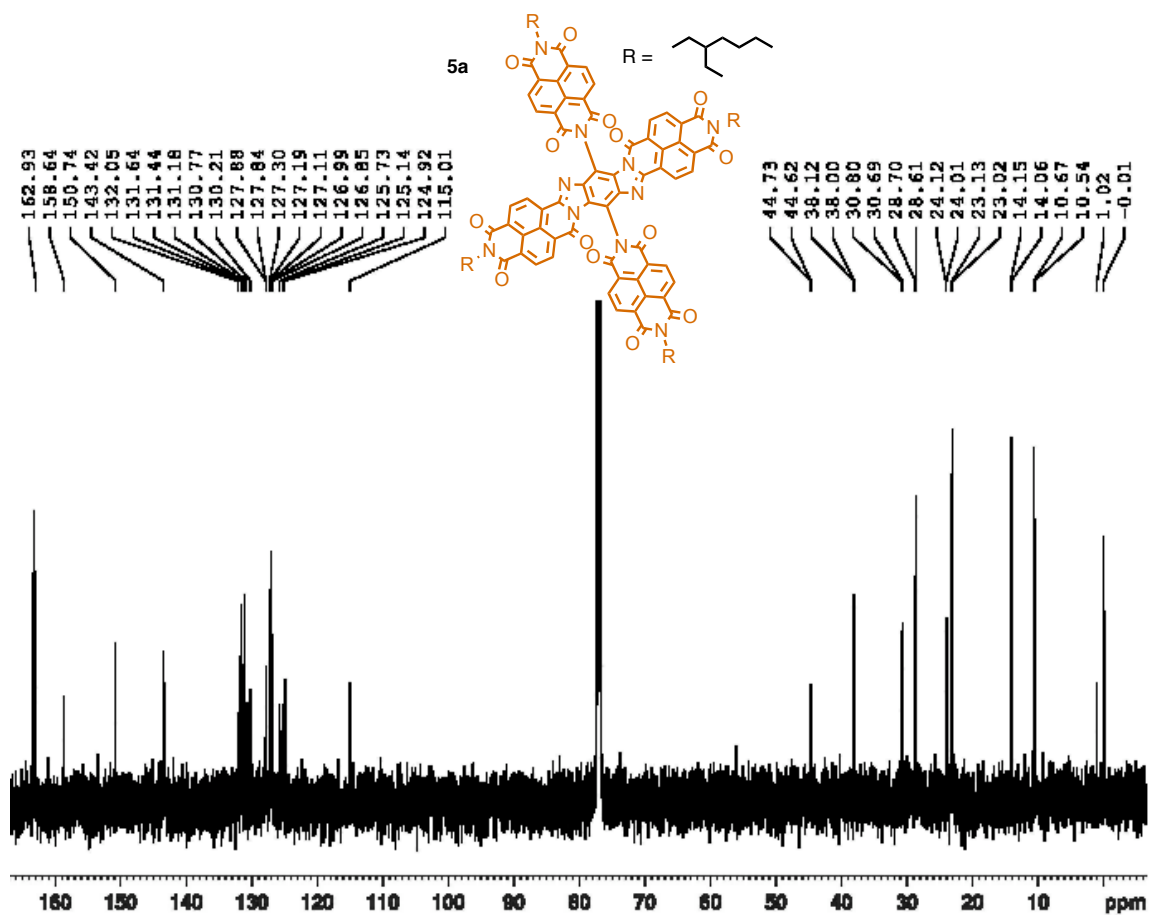

Figure S21.  $^{13}\text{C}$  NMR of **5a** (298 K,  $\text{CDCl}_3$ ).

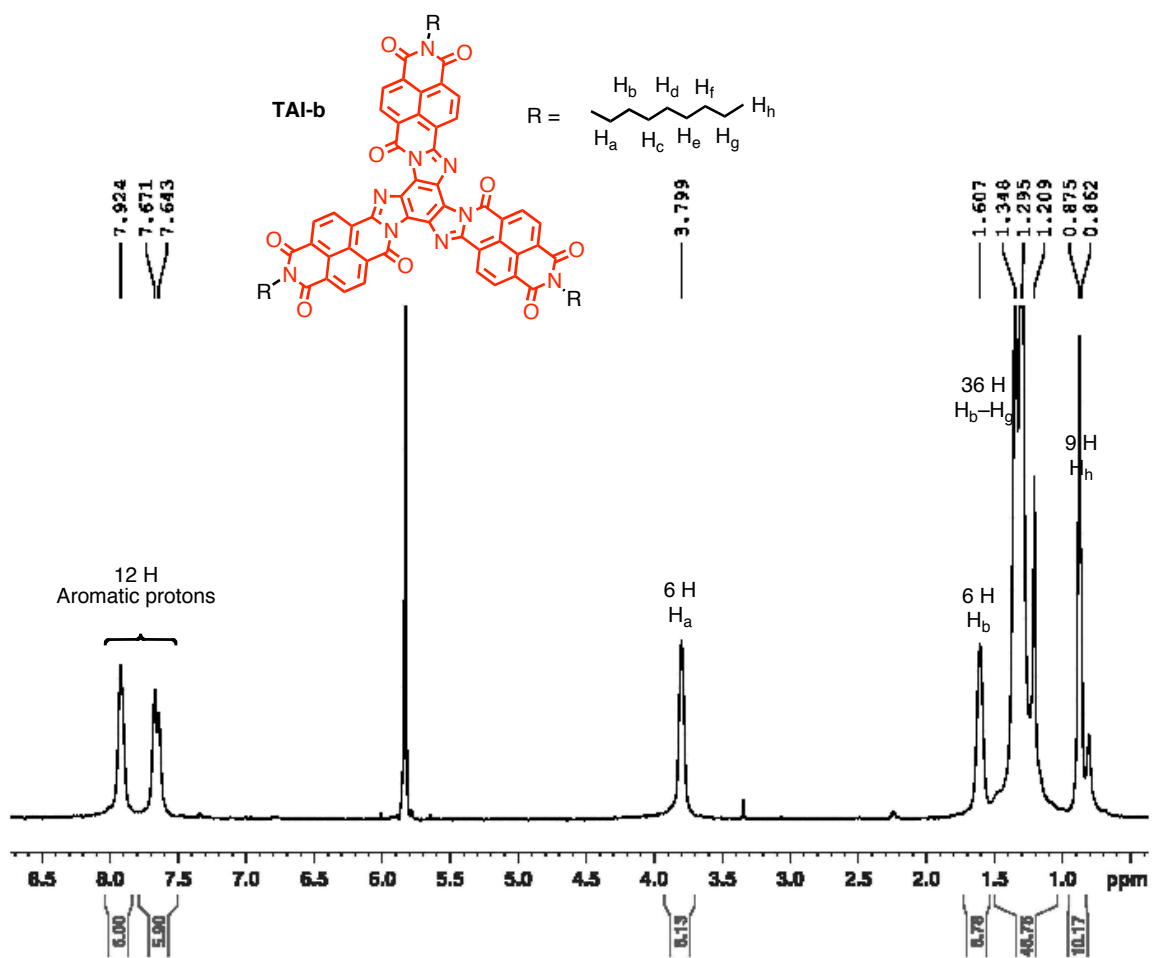

Figure S22. <sup>1</sup>H NMR of TAI-b (413 K, C<sub>2</sub>D<sub>2</sub>Cl<sub>4</sub>).

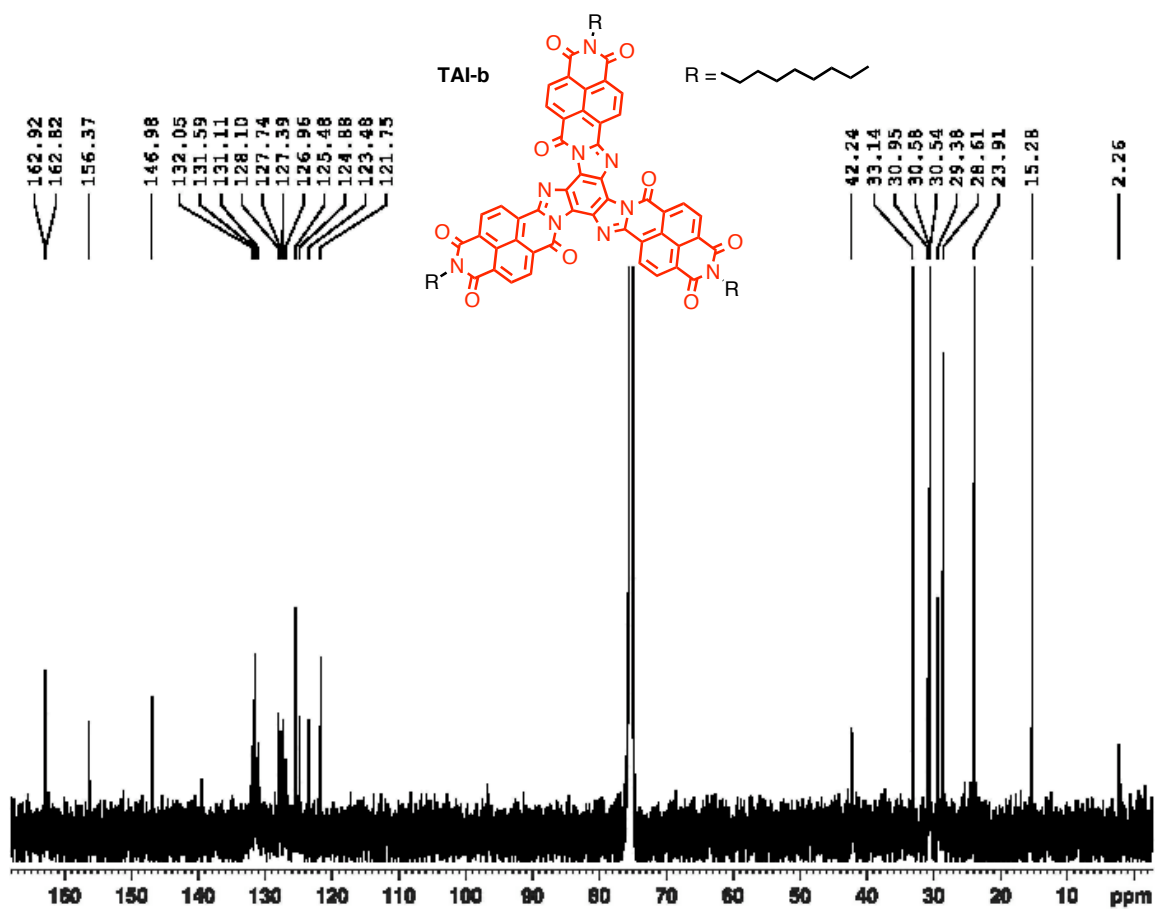

Figure S23. <sup>13</sup>C NMR of TAI-b (413 K, C<sub>2</sub>D<sub>2</sub>Cl<sub>4</sub>).



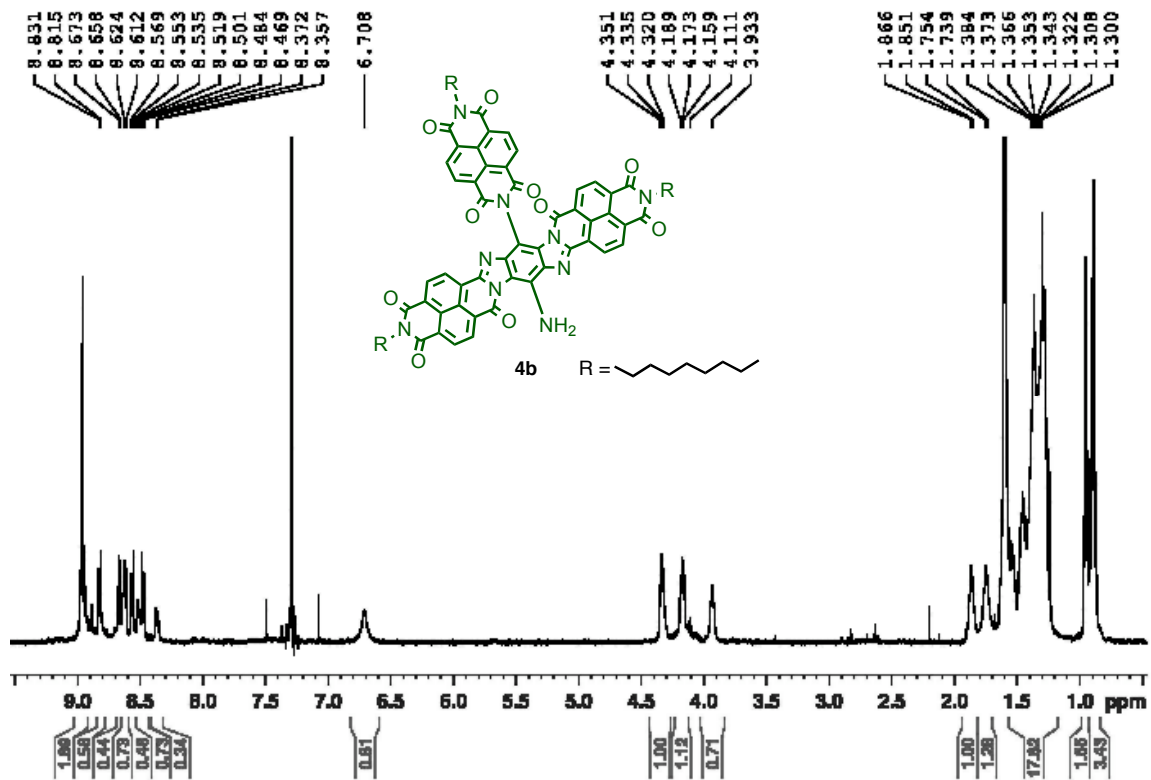

Figure S24.  $^1\text{H NMR}$  of **4b** (298 K,  $\text{CDCl}_3$ ).

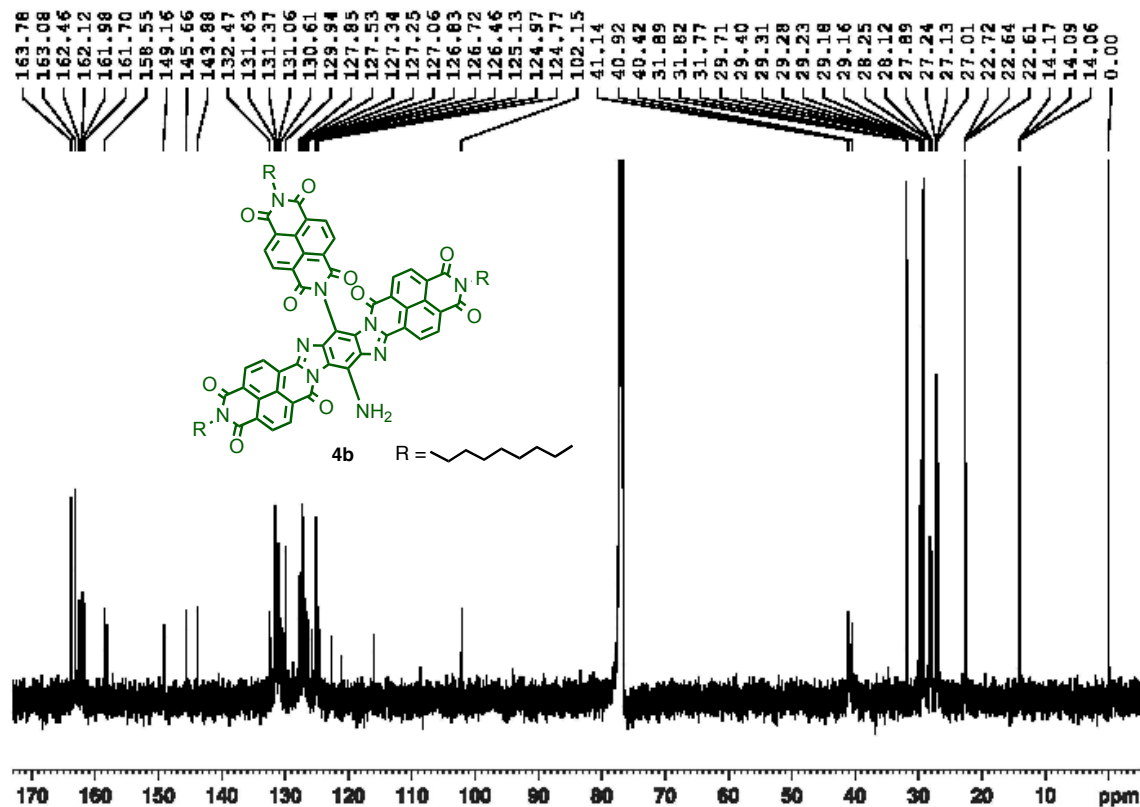

Figure S25.  $^{13}\text{C}$  NMR of **4b** (298 K,  $\text{CDCl}_3$ ).

References:

- S1. Rogers, D. Z. *J. Org. Chem.* **1986**, *51*, 3905-3907.
- S2. Ganesan, P.; Yang, X.; Loos, J.; Savenije, T. J.; Abellon, R. D.; Zuilhof, H.; Sudhoelter, E. J. R. *J. Am. Chem. Soc.* **2005**, *127*, 14530-14531.
- S3. Q-Chem is a product of Q-Chem. Inc.
- S4. Hohenberg, P.; Kohn, W. *Phys. Rev.* **1964**, *136*, B864.
- S5. Kohn, W.; Sham, L. J. *Phys. Rev.* **1965**, *140*, A1133.
- S6. Tretiak, S.; Mukamel, S. *Chem. Rev.* **2002**, *102*, 3171.
